# Supplementary material for: Determining Thermal Conductivity of Small Molecule Amorphous Drugs with Modulated Differential Scanning Calorimetry and Vacuum Molding Sample Preparation
Source: MDPI journal article supplement (doi:10.3390/pharmaceutics11120670), 2019-12-10
Supplement: s1 [file s1]

# Supplementary Materials: Determining Thermal Conductivity of Small Molecule Amorphous Drugs with Modulated Differential Scanning Calorimetry and Vacuum Molding Sample Preparation

Maximilian Karl, Jukka Rantanen and Thomas Rades

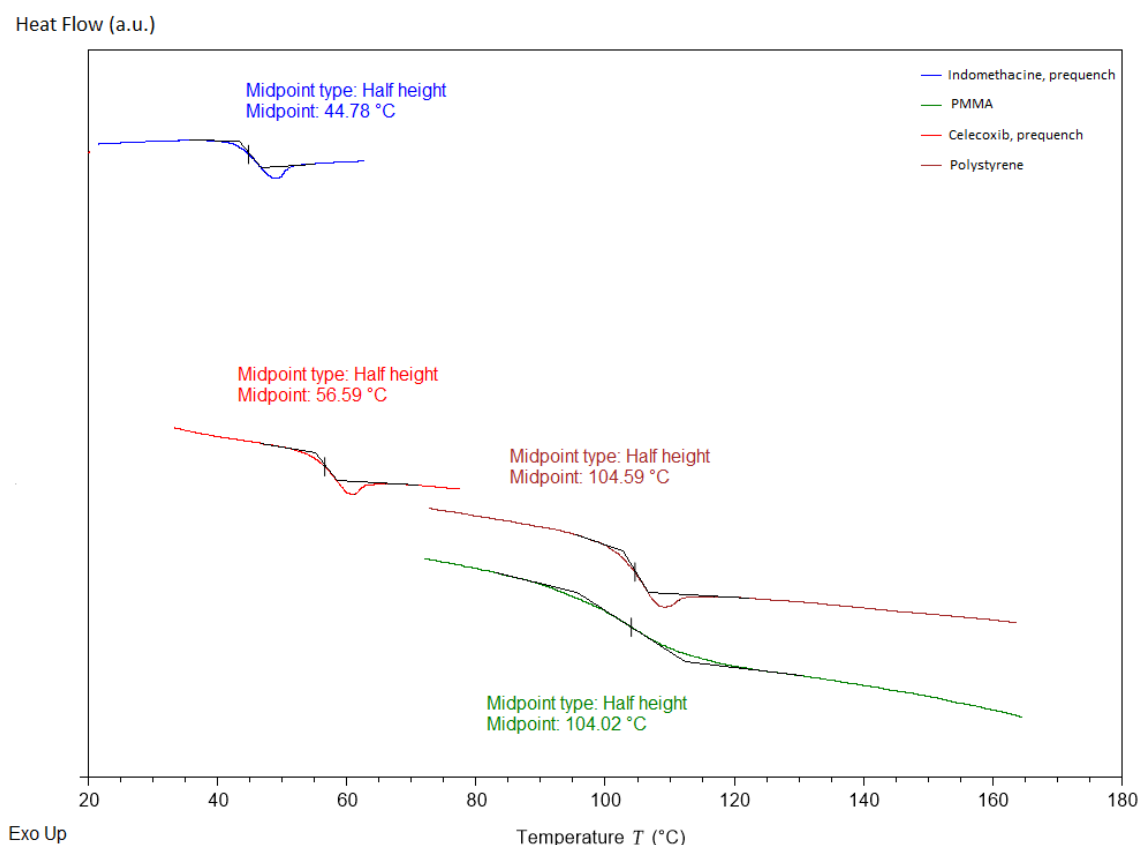

**Figure S1.** Single Differential Scanning Calorimetry (DSC) (none modulated) measurements to determine the respective sample glass transition temperatures.

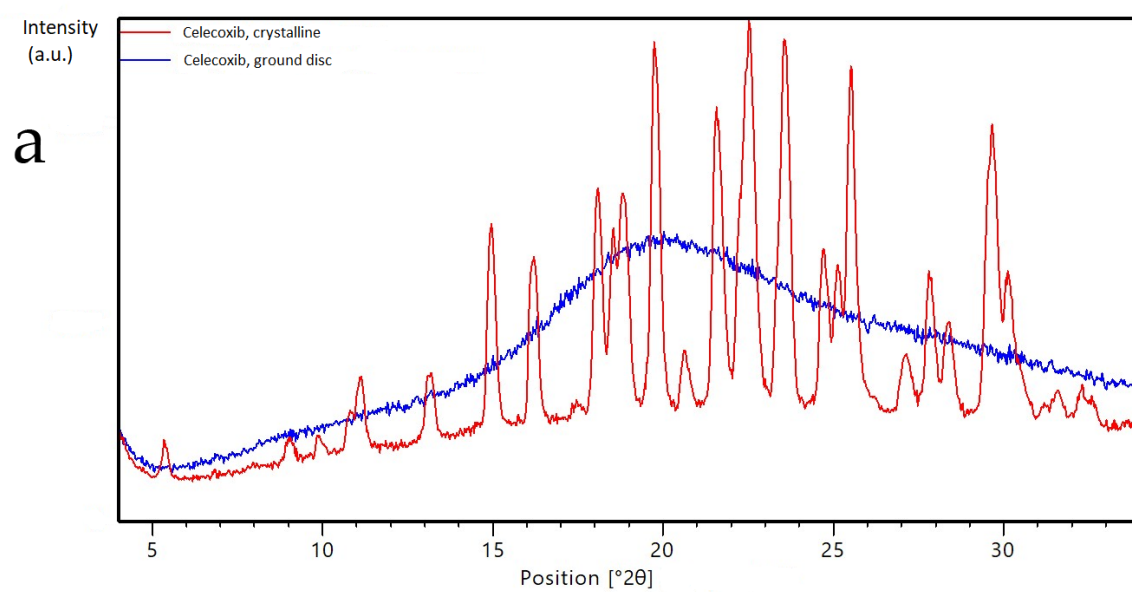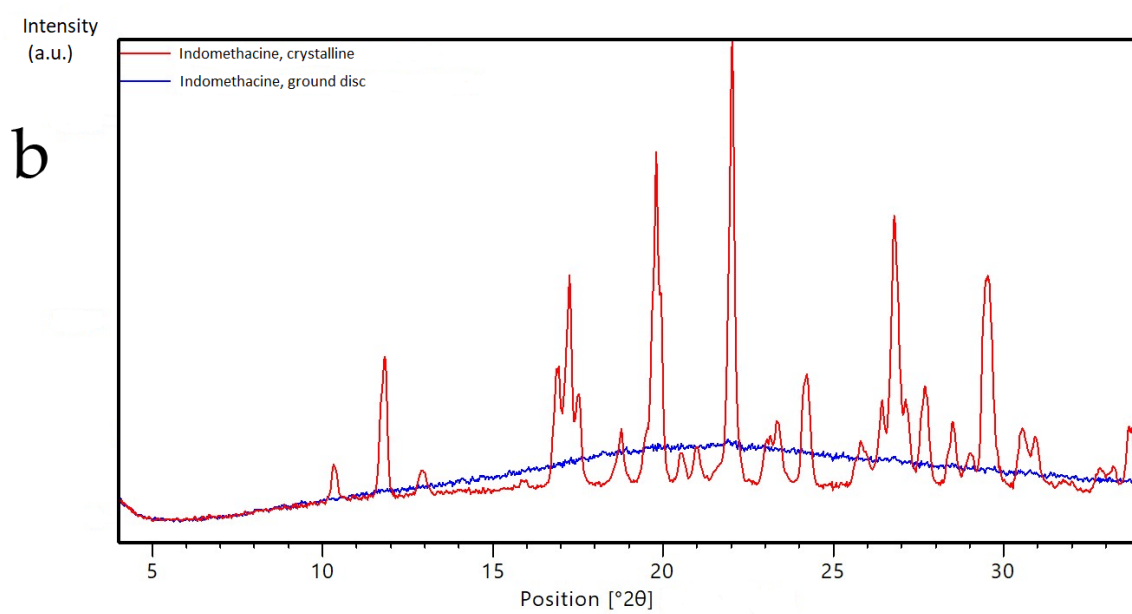

**Figure S2.** X-ray powder diffractograms of crystalline and amorphous (ground disc sample) celecoxib and indomethacin.
